# Supplementary material for: Shallow Water Bathymetry Retrieval Using a Band-Optimization Iterative Approach: Application to New Caledonia Coral Reef Lagoons Using Sentinel-2 Data
Source: MDPI journal article supplement (doi:10.3390/rs13204108), 2021-10-14
Supplement: s1 [file s1]

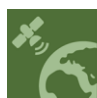

Supplementary Materials:

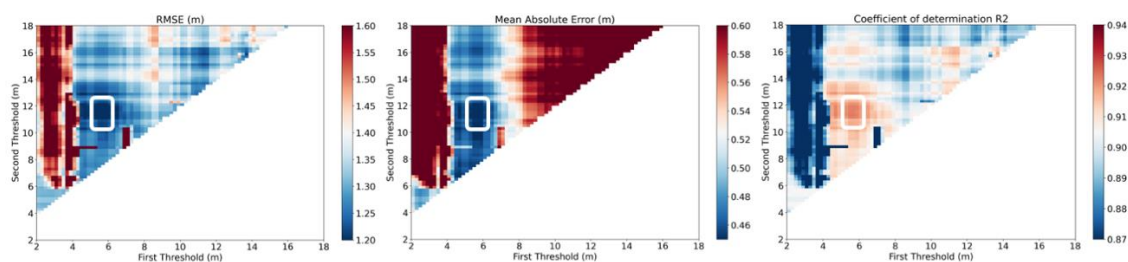

**Figure S1:** Influence of the choice of threshold pair on the IMBR performance (RMSE, MAE,  $R^2$ ). White rectangles showing best areas of thresholds combination.

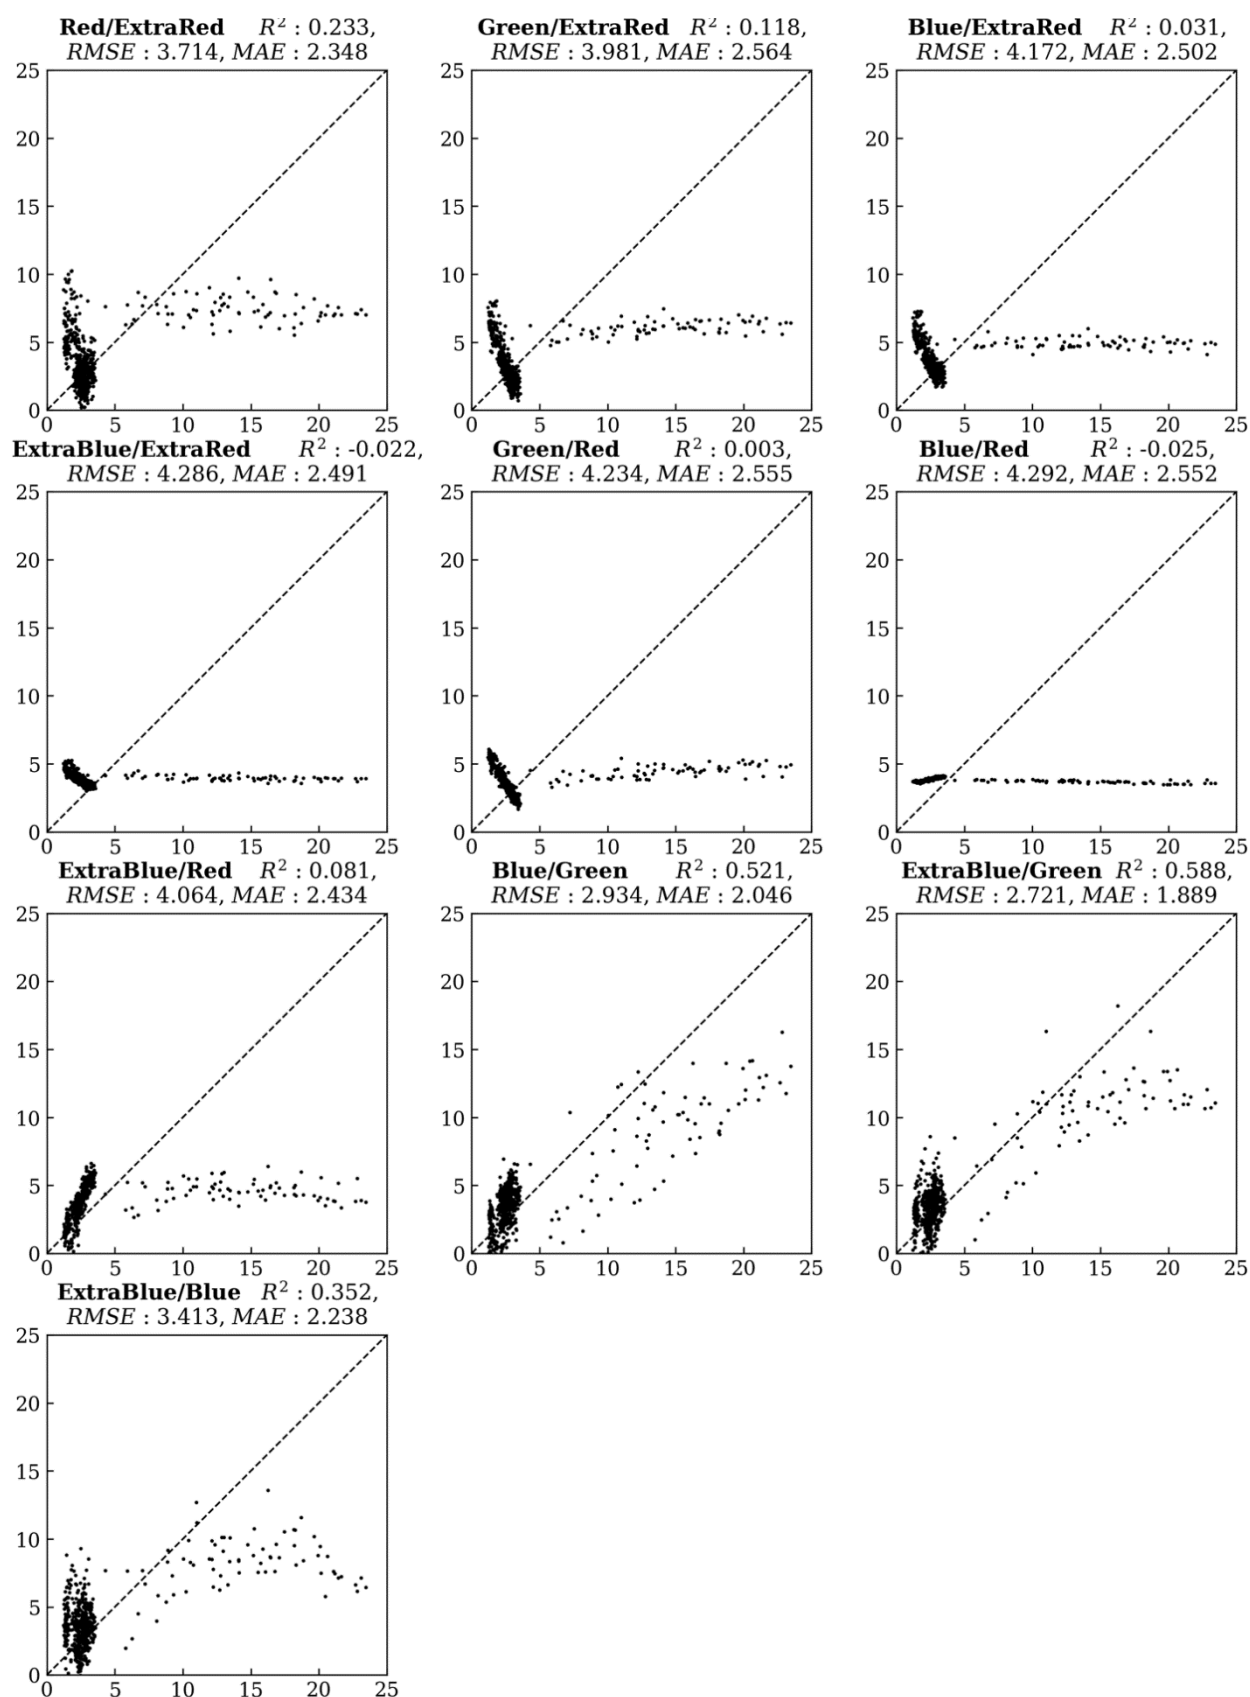

**Figure S2:** All possible combinations of SBR model outputs compared with in situ data on ELA. Accuracy metrics are provided above each validation plot.
